# Supplementary material for: Magnetic dipolarizations inside geosynchronous orbit with tailward ions flow
Source: Copernicus journal article supplement (doi:10.5194/angeo-2018-128), 2018-11-22

# 1 Magnetic dipolarizations inside geosynchronous orbit with tailward 2 ions flow

3 Xiaoying Sun<sup>1,2</sup>, Weining William Liu<sup>1</sup>, Suping Duan<sup>1</sup>

4 <sup>1</sup> State Key Laboratory of Space Weather, National Space Science Center (NSSC), Chinese Academy of Sciences (CAS),  
5 Beijing, 100190, China

6 <sup>2</sup>University of Chinese Academy of Sciences, Beijing, 100049, China

7 *Correspondence to:* W. W. Liu (wliu@nssc.ac.cn), Suping Duan (spduan@nssc.ac.cn)

8 **Abstract.** Electromagnetic field and plasma data from the Time History of Events and Macroscale Interactions  
9 during Substorms (THEMIS) near-Earth probes are used to investigate magnetic dipolarizations inside geosynchronous orbit  
10 on 27 August 2014 during an intense substorm with  $AE_{max} \sim 1000$  nT. THEMIS-D (TH-D) was located inside  
11 geosynchronous orbit around midnight in the interval from 09:25 UT to 09:55 UT. During this period two distinct magnetic  
12 dipolarizations with tailward ions flow are observed by TH-D. The first one is displayed by magnetic elevation angle  
13 increase from 15 degree to 25 degree around 09:30:40 UT. The tailward perpendicular velocity is  $V_{\perp x} \sim -50$  km/s. The  
14 second one is presented by the elevation angle increase from 25 degree to 45 degree around 09:36 UT. And the tailward  
15 perpendicular velocity is  $V_{\perp x} \sim -70$  km/s. These two significant dipolarizations are accompanied with the sharp increase in  
16 the energy flux of energetic electron inside geosynchronous. After 5 min expanding of near-Earth plasma sheet (NEPS),  
17 THEMIS-E (TH-E) located outside geosynchronous orbit also detects this tailward expanding plasma sheet with ion flow -  
18 150 km/s. The dipolarization propagates tailward with speed -47 km/s, along 2.2  $R_E$  distance in the X direction between  
19 TH-D and TH-E within 5 min. These dipolarizations with tailward ions flow observed inside geosynchronous orbit indicate  
20 new energy transfer path in the inner magnetosphere during substorms.

21 **Keywords:** Magnetic dipolarization, tailward ions flow, near-Earth plasma sheet, intense substorm

## 22 Introduction

23 Magnetic dipolarization can be observed at or inside geosynchronous orbit during intense substorms with high  $AE$  index  
24 ( $AE > 500$  nT) [e.g., Dai et al., 2015; Nagai, 1982; Nosé et al., 2014; Ohtani et al., 2018]. Dipolarizations are marked by the  
25 magnetic elevation angle increase with the decrease in the radial components of  $B_x$  and  $B_y$ , and the increase in the  $B_z$   
26 component [Liu and Liang, 2009; Duan et al., 2011; Dai et al., 2014, 2015]. Ohtani et al. [2018] presented the statistics  
27 characteristics of magnetic dipolarizations inside geosynchronous orbit. They reported that the dipolarization region  
28 expanded in the azimuthal direction with speed 60 km/s at 5.5  $R_E$ . Using multiple satellites conjunction observations at or

29 inside geosynchronous orbit, Dai et al. [2015] reported that the large dipolarization electric field was associated with  
 30 substorm injection of MeV electrons into the inner magnetosphere ( $r < 6.6 R_E$ ).  
 31  
 32 Magnetic dipolarizations are accompanied with complex ions bulk flow in the near-Earth plasma sheet (NEPS) [e.g., Duan et  
 33 al., 2008; Liang et al., 2009]. Especially, it is more complex in the inner edge of ~~NEPS~~ NEPS. Usually, the substorm-  
 34 associated dipolarizations in the NEPS are accompanied with earthward ions bulk flow [e.g., Angelopoulos et al., 1992;  
 35 Baumjohann et al., 1999; Duan et al., 2011; Liang et al., ~~2008~~ 2009; Liu et al., 2008; Nakamura et al., 2009; Shiokawa et al.,  
 36 1998]. According to conjunction observations of THEMIS multiple probes in the NEPS, Duan et al. [2011] pointed out that the  
 37 dipolarization at inner edge of the near-Earth plasma sheet had no one-to-one relationship with the earthward ions bulk flow.  
 38 Lui et al. [1999] pointed out that dipolarization at  $X \sim 10 R_E$  was detected with tailward flow. Inside geosynchronous orbit,  
 39 magnetic dipolarizations were detected with earthward ions bulk flow [Dai et al., 2015].  
 40  
 41 Near-Earth Dipolarizations with low frequency waves are detected with thermal ions and electron energization [e.g., Dai et  
 42 al., 2015; Liang et al., ~~2008~~, 2009; Nosé et al., 2014; Ohtani et al., 2018]. These energetic particles are main source of inner  
 43 magnetosphere during substorms and storms. Nosé et al. [2014] proposed that the dipolarizations associated with low  
 44 frequency fluctuations were observed in the inner magnetosphere during the storm main phase. These low frequency  
 45 electromagnetic waves can accelerate  $O^+$  ions in the perpendicular direction. The low frequency waves can accelerate  
 46 particles crossing the magnetic field with large perpendicular electric field [e.g., Dai et al., 2014, 2015; Duan et al., 2016;  
 47 Nosé et al., 2014]. Usually, Dipolarization associated dispersionless energetic particle injections is accompanied with  
 48 earthward ions bulk flow in the NEPS [Dai et al., 2015]. But few reports show that dipolarizations with the sharply increase  
 49 in the energy flux of energetic particles associated with tailward ions flow at or inside geosynchronous orbit.  
 50  
 51 The ballooning mode occurred in the near-Earth plasma sheet are associated with tailward expansion of plasma sheet during  
 52 substorms [Liu, 1997; Liu et al., 2008; Liu and Liang, 2009; Liang et al., 2009; Saito et al., 2008]. Liu et al. [2008] pointed  
 53 out that the ballooning mode could excite a quasi-electrostatic field a few minutes before local current disruption and that the  
 54 perturbations associated with ballooning instability propagated downtail.  
 55  
 56 In this paper we present ~~a~~ dipolarizations with tailward ions flow inside geosynchronous orbit during an intense substorm  
 57 expansion phase. The observations in detail of an intense substorm on 27 August 2014 by TH-D and TH-E are presented in  
 58 section 2. Discussions and conclusions of our observation results are displayed in the last section.

## 59 Observations of an intense substorm on 27 August 2014

60 The OMNI data of the solar wind, interplanetary magnetic field (IMF) and geomagnetic field index  $Dst$  and  $AE$  during a  
61 storm on August 27, 2014 are presented in Figure 1. The minimum value of  ~~$Dst$~~   $SYM-H$  index is about ~~-80~~ -90 nT, as  
62 shown in Figure ~~1e~~ 1f, imply that a moderate storm take placed. During the main phase of this moderate storm, there is an  
63 intense substorm with the  $AE$  maximum value ~~1273~~ 700 nT around 10:10 UT. The beginning time of this intense substorm  
64 expansion phase is around 09:31 UT with decrease in the  $AL$  index. A significant substorm enhancement occur around 09:48  
65 UT with sharply decrease in the  $AL$  index and increase in the  $AE$  index.

66  
67 During this intense substorm, THEMIS probes [Angelopoulos, 2008], such as TH-D and TH-E are both located in the near-  
68 Earth magnetotail. Figure 2 displays the orbits of TH-D and TH-E from 09:20 to 10:00 UT in the SM coordinate system. At  
69 09:30 UT, locations of these two spacecraft in SM coordinates, are (~~-6.01~~ -6.10, -0.06, ~~+1.12~~ 0.43)  $R_E$  for TH-D, (~~-8.10~~ -8.26,  
70 -2.28, ~~+1.92~~ 0.99)  $R_E$  for TH-E, respectively. TH-D orbit plot presents that it is located inside geosynchronous orbit at the  
71 beginning time of this intense substorm expansion phase. On the other hand, TH-E is located outside geosynchronous orbit.  
72 These two spacecraft present good conjunction observations during this intense substorm expansion phase. The instruments  
73 adopted in our investigations are the fluxgate magnetometer (FGM) [Auster et al., 2008], the electrostatic analyzer (ESA)  
74 [McFadden et al., 2008], the electric field instrument (EFI) [Bonnell et al., 2008] and the solid state telescope (SST) on  
75 board the THEMIS probes.

76  
77 Figure 3 shows the plasma parameters and the electromagnetic field detected by TH-D mostly inside geosynchronous orbit at  
78 about midnight section. The solar magnetic (SM) coordinate system is adopted. From top to bottom, panels are the total  
79 magnetic field value,  $B_t$  and the  $B_x$  component, the  $B_y$  and  $B_z$  components, the magnetic field elevation angle defined by  
80  $\theta = \tan^{-1}(B_z/(B_x^2 + B_y^2)^{1/2})$ , the ion and electron density, temperature, the plasma beta value  $\beta$ ,  $\beta = 2\mu_0 nT/B^2$ , which  
81 determines the location of the satellite [Miyashita et al., 2000], three components of ions bulk flow velocity parallel (black  
82 line) and perpendicular (red line) to the magnetic field,  $V_x$ ,  $V_y$  and  $V_z$ , three components of the electric field, the  $E_x$  (red), the  
83  $E_y$  (black) and the  $E_z$  (blue), there components of convection electric field from  $\mathbf{V} \times \mathbf{B}$ , the  $E_{cx}$  (red), the  $E_{cy}$  (black) and the  
84  $E_{cz}$  (blue), respectively. Figure 3 displays the distinct fluctuations of the magnetic field and plasma density and velocity  
85 around 09:30 UT and 09:36 UT, respectively. The magnetic elevation angle has two step clear enhancements as displayed in  
86 Figure 3c. The first increase in elevation angle is from about 15 degree to 25 degree during the interval from 09:30:34 UT to  
87 09:30:54 UT, which are marked by the left two vertical dashed lines in Figure 3. The total magnetic field value and the  $B_x$   
88 component both decrease. The  $B_z$  component increase weakly from about 35 nT to 45 nT. The  $B_y$  component has obvious  
89 fluctuations around 0 nT. These magnetic signatures indicate a magnetic dipolarization take places inside geosynchronous  
90 orbit around (-6.10, -0.06, 0.43)  $R_E$ . During this weak magnetic field dipolarization, the plasma beta value,  $\beta$ , increases  
91 from around 0.5 to 1.0. The electron density and temperature both increase. The ion density also increases. But ion

92 temperature decreases. Accompanied this dipolarization the tailward ions bulk flow,  $V_{//x} \sim -100 \text{ km/s}$  and the perpendicular  
 93 component to the magnetic field in the X direction,  $V_{\perp x} \sim -50 \text{ km/s}$  is detected by TH-D, as shown in Figure 3g. The  
 94 perpendicular velocity in the Y direction is mainly dawnward at the beginning time of this dipolarization,  $V_{\perp y} \sim -30 \text{ km/s}$ .  
 95 The electric field detected by TH-D also has large fluctuations with negative  $E_y$  value during the first depolarization as  
 96 shown in Figure 3j. During the intervals from 09:30:34 UT to 09:30:54 UT the convection electric field direction is  
 97 dawnward with large magnitude,  $E_{cy} \sim -12 \text{ mV/m}$ , as presented in Figure 3k. The second magnetic field elevation angle  
 98 increases sharply at around 09:36 as displayed in Figure 3c marked by the right two vertical dashed lines. The elevation  
 99 angle increases from about 25 degree to 45 degree during the interval from 09:36:06 UT to 09:36:21 UT. The magnetic field  
 100 has similar variations to the first dipolarization signatures. Especially, the second dipolarization has larger elevation angle  
 101 maximum value,  $\sim 45$  degree, as marked by the fourth vertical dashed line in Figure 3c. During the second dipolarization the  
 102 tailward ions bulk flow perpendicular to the magnetic field is also detected by TH-D,  $V_{\perp x} \sim -70 \text{ km/s}$ , as presented in Figure  
 103 3g. Also the significant negative  $E_y$  component is companied by this intense dipolarization in Figure 3j and 3k.

104  
 105 During the intervals of magnetic dipolarizations with tailward ions bulk flow detected by TH-D inside geosynchronous orbit,  
 106 TH-E observed very weak increase in the magnetic field elevation angle and the  $B_z$  component around 09:35 UT and 09:41  
 107 UT, as shown in Figure 4b and 4c, about 5 min after two dipolarizations detected by TH-D. The ions and electron density  
 108 and temperature increase weakly from very low value as displayed in Figure 4d and 4e. Outside geosynchronous orbit, TH-E  
 109 observed very low beta value, as shown in Figure 4f,  $\beta \sim 0.01$  and  $\beta \sim 0.2$  around 09:35 UT and 09:41 UT, respectively.  
 110 Interesting phenomena that the weak dipolarization was with the tailward ions bulk flow,  $V_{//x} \sim -180 \text{ km/s}$ , is also detected  
 111 by TH-E around 09:35 UT as shown in Figure 4g. The perpendicular velocity is dominated in the negative Y direction,  $V_{\perp y} \sim$   
 112  $-50 \text{ km/s}$ .

113  
 114 Associated with the intense electric field observed by TH-D inside geosynchronous orbit during this two dipolarizations, the  
 115 energy fluxes of energetic electrons, as shown in the second panel of Figure 5, with energy of 31 keV (blue), 41 keV (gray),  
 116 52 keV (red), 65.5 keV (black), 93 keV (brown) and 139 keV (purple) all simultaneously increase at 09:30:38 UT and  
 117 09:36:09 UT detected by SST/TH-D, respectively. These energetic electrons have quasi-perpendicular pitch angle  
 118 distribution, as presented in the bottom panel of Figure 5.

## 119 Discussion and conclusions

120 The dipolarizations with tailward ions bulk flow inside geosynchronous orbit are investigated in our present paper.  
 121 Accompanied these dipolarizations the energy fluxes of energetic electrons with energy between 31 keV and 139 keV  
 122 simultaneously increase inside geosynchronous orbit. According to these energetic electrons pitch angle distributions, it is

found that high energy electrons mainly in the quasi-perpendicular direction to the magnetic field, as shown in Figure 5. On the other hand, the inductive electric field during these two magnetic dipolarization is in the dawnward direction as display in Figure 3j and 3k. Previous research work reported that the inductive electric field associated with substorm dipolarization can accelerate particles in the near-Earth plasma sheet [e.g. Dai et al., 2014, 2015; Duan et al., 2016; Fu et al., 2011; Fok et al., 2001; Liu et al., 2010; Lui et al., 1988, 1999; Nakamura et al., 2009; Nosé et al., 2014]. As shown in Figure 3j around 09:36:30 UT the inductive electric fields in the second dipolarization are dominated in the  $E_y$  component with large negative value,  $E_y \sim -25 \text{ mV/m}$ , and the X component also increase with negative value  $E_x \sim -6 \text{ mV/m}$ . This intense electric field can drive ions moving into the tailward-dawnward direction. On the other hand, we can calculate the energy quantity relationship between the electric field and energetic electrons. Estimating the energy of such intense  $E_y$  in the distance of  $\sim 1000 \text{ km}$  is about  $\sim 10^{-15}$  Joule. The energetic electrons with energy range from  $31 \text{ keV}$  to  $139 \text{ keV}$  are in the same energy order  $\sim 10^{-15}$  Joule. It is inferred that the intense  $E_y$  can perpendicularly accelerate electrons to tens  $\text{keV}$  state.

Dipolarizations occurring at the inner edge of plasma sheet are complicated with disturbances of ions bulk flow and electromagnetic field. Lui et al. [1999] pointed out that near-Earth dipolarization was a non-MHD process and was also accompanied with tailward ions flow. Our observations of dipolarizations inside geosynchronous orbit are also associated with tailward ions flow. This result is consistent with the report proposed by Liu et al. [2008] that the perturbations associated with the ballooning mode in the near-Earth plasma sheet propagating tailward. Based on the statistic studies, Nosé et al. [2016] proposed that the occurrence probability of the dipolarizations in the inner magnetosphere had a peak at 21:00-00:00 MLT. Our observations show that two distinct dipolarizations with tailward flow inside geosynchronous orbit are detected by TH-D around 00:02 MLT and 00:05 MLT, respectively.

According to the distance between TH-D and TH-E,  $(-2.23, -2.30, 0.56)R_E$ , and the delay time of dipolarization from inside to outside geosynchronous orbit,  $\sim 5 \text{ min}$ , the dipolarization propagating speed or the plasma sheet expanding speed can be estimated as  $V_x \sim -47 \text{ km/s}$ ,  $V_y \sim -48 \text{ km/s}$ ,  $V_z \sim 12 \text{ km/s}$ , respectively. Liou et al. [2002] proposed that the dipolarization region expanding speed was  $\sim 60 \text{ km/s}$  westward at geosynchronous. Comparing observations between TH-D and TH-E in our investigations, the azimuth speed of dipolarization region is obtained  $\sim 48 \text{ km/s}$ . These two observational results are consistent with each other. The dipolarization associated with the current disruption propagated tailward with speed  $V_x \sim -100 \text{ km/s}$  detected by THEMIS satellites in the near-Earth plasma sheet  $X \sim -11R_E$  [Liu et al., 2008]. It is larger than the dipolarization propagating speed from inside to outside geosynchronous orbit  $V_x \sim -47 \text{ km/s}$ . The different speeds of dipolarizations propagating tailward imply that the magnitude of the dipolarization speed may be associated with its beginning location in magnetotail plasma sheet.

155 On the other hand, Lui [1991] reported that substorm disturbance propagated tailward through a rarefaction wave front  
156 accompanied by earthward flow during substorm expansion phase early period. Chao et al. [1977] proposed that the  
157 rarefaction wave propagating tailward was accompanied by the thinning of plasma sheet and earthward plasma flow. This  
158 earthward flow is possibly convection flow or outflow flow of magnetic reconnection from the middle magnetotail.

159

160 Based on the above observation analysis, we can draw the results as following. Two distinct magnetic dipolarizations with  
161 tailward ions flow are observed by TH-D inside geosynchronous orbit on 27 August 2014 during the intense substorm with  
162  $AE_{max} \sim 1000\text{nT}$ . TH-D was located inside geosynchronous orbit around midnight in the interval from 09:20 UT to 10:00  
163 UT. The first dipolarization is displayed by magnetic elevation angle increase from 15 degree to 25 degree around  
164 09:30:40UT. The second one is presented by the elevation angle increase from 25 degree to 45 degree around 09:36 UT.  
165 These two significant dipolarizations are accompanied with the energy flux of energetic electrons simultaneously increase  
166 inside geosynchronous orbit. After 5 min expanding tailward of near-Earth plasma sheet, TH-E located outside  
167 geosynchronous orbit also detects this tailward expanding plasma sheet with ion flow  $-150\text{ km/s}$ . The dipolarization  
168 propagates tailward with speed  $-45\text{ km/s}$ , along  $2 R_E$  distant in the X direction between TH-D and TH-E within 5 min.  
169 These dipolarizations with tailward ion flow observed inside geosynchronous orbit indicate new energy transfer path in the  
170 inner magnetosphere during substorms.

## 171 Acknowledgments

172 We acknowledge NASA contract NAS5-02099 for use of data from the THEMIS Mission. Specifically: “D. Larson and R.  
173 P. Lin for use of SST data, C. W. Carlson and J. P. McFadden for use of ESA data; J. Bonnell and F. S. Mozer for use of  
174 the EFI data; K. H. Glassmeier, U. Auster and W. Baumjohann for the use of FGM data provided under the lead of the  
175 Technical University of Braunschweig and with financial support through the German Ministry for Economy and  
176 Technology and the German Center for Aviation and Space (DLR) under contract 50 OC 0302. The authors thank NASA  
177 CDAWeb and Taiwan AIDA for THEMIS data. The SYM – H index was provided by Data Analysis Center for  
178 Geomagnetism and Space Magnetism in Kyoto, Japan. This work is supported by the National Natural Science Foundation  
179 of China grants 41674167, 41731070 and 41574161; and in part by the Specialized Research Fund for State Key  
180 Laboratories.

## 181 References

182 Angelopoulos, V.: The THEMIS Mission, Space Science Reviews, 141, 5-34, 2008.  
183 Angelopoulos, V., Baumjohann, W., Kennel, C. F., Coroniti, F. V., Kivelson, M. G., Pellat, R., Walker, R. J., Lüthi, H., and  
184 Paschmann, G.: Bursty bulk flows in the inner central plasma sheet, Journal of Geophysical Research, 97, 4027, 1992.

185 Auster, H. U., Glassmeier, K. H., Magnes, W., Aydogar, O., Baumjohann, W., Constantinescu, D., Fischer, D., Fornacon, K.  
 186 H., Georgescu, E., Harvey, P., Hillenmaier, O., Kroth, R., Ludlam, M., Narita, Y., Nakamura, R., Okrafka, K., Plaschke, F.,  
 187 Richter, I., Schwarzl, H., Stoll, B., Valavanoglou, A., and Wiedemann, M.: The THEMIS Fluxgate Magnetometer, Space  
 188 Science Reviews, 141, 235-264, 2008.

189 Baumjohann, W., Hesse, M., Kokubun, S., Mukai, T., Nagai, T., and Petrukovich, A. A.: Substorm dipolarization and  
 190 recovery, Journal of Geophysical Research: Space Physics, 104, 24995-25000, 1999.

191 Bonnell, J. W., Mozer, F. S., Delory, G. T., Hull, A. J., Ergun, R. E., Cully, C. M., Angelopoulos, V., and Harvey, P. R.: The  
 192 Electric Field Instrument (EFI) for THEMIS, Space Science Reviews, 141, 303-341, 2008.

193 [Chao J., K. J. R. Kan, A. T. Y. Lui and S.-I. Akasofu A model for thinning of the plasma sheet, Planet. Space Sci., 25,](#)  
 194 [703-710, 1977.](#)

195 Dai, L., Wang, C., Duan, S., He, Z., Wygant, J. R., Cattell, C. A., Tao, X., Su, Z., Kletzing, C., Baker, D. N., Li, X.,  
 196 Malaspina, D., Blake, J. B., Fennell, J., Claudepierre, S., Turner, D. L., Reeves, G. D., Funsten, H. O., Spence, H. E.,  
 197 Angelopoulos, V., Fruehauff, D., Chen, L., Thaller, S., Breneman, A., and Tang, X.: Near-Earth injection of MeV electrons  
 198 associated with intense dipolarization electric fields: Van Allen Probes observations, Geophys Res Lett, 42, 6170-6179, 2015.

199 Dai, L., Wygant, J. R., Cattell, C. A., Thaller, S., Kersten, K., Breneman, A., Tang, X., Friedel, R. H., Claudepierre, S. G.,  
 200 and Tao, X.: Evidence for injection of relativistic electrons into the Earth's outer radiation belt via intense substorm electric  
 201 fields, Geophysical Research Letters, 41, 1133-1141, 2014.

202 Duan, S., Liu, Z., Cao, J., Lu, L., Rème, H., Dandouras, I., and Carr, C. M.: TC-1 observation of ion high-speed flow  
 203 reversal in the near-Earth plasma sheet during substorm, Science in China Series E: Technological Sciences, 51, 1721-1730,  
 204 2008.

205 Duan, S. P., Dai, L., Wang, C., Liang, J., Lui, A. T. Y., Chen, L. J., He, Z. H., Zhang, Y. C., and Angelopoulos, V.: Evidence  
 206 of kinetic Alfvén eigenmode in the near-Earth magnetotail during substorm expansion phase, Journal of Geophysical  
 207 Research-Space Physics, 121, 4316-4330, 2016.

208 Duan, S. P., Liu, Z. X., Liang, J., Zhang, Y. C., and Chen, T.: Multiple magnetic dipolarizations observed by THEMIS  
 209 during a substorm, Annales Geophysicae, 29, 331-339, 2011.

210 Fok, M.-C., Moore, T. E., and Spjeldvik, W. N.: Rapid enhancement of radiation belt electron fluxes due to substorm  
 211 dipolarization of the geomagnetic field, Journal of Geophysical Research: Space Physics, 106, 3873-3881, 2001.

212 Fu, H. S., Khotyaintsev, Y. V., André M., and Vaivads, A.: Fermi and betatron acceleration of suprathermal electrons  
 213 behind dipolarization fronts, Geophysical Research Letters, 38, n/a-n/a, 2011.

214 Liang, J., Liu, W. W., and Donovan, E. F.: Ion temperature drop and quasi-electrostatic electric field at the current sheet  
 215 boundary minutes prior to the local current disruption, Journal of Geophysical Research: Space Physics, 114, n/a-n/a, 2009.

216 Liou, K., Meng, C.-I., Lui, A. T. Y., Newell, P. T., and Wing, S.: Magnetic dipolarization with substorm expansion onset,  
 217 Journal of Geophysical Research, 107, 2002.

218 Liu, W. W.: Physics of the explosive growth phase: Ballooning instability revisited, *Journal of Geophysical Research: Space*  
 219 *Physics*, 102, 4927-4931, 1997.

220 Liu, W. W. and Liang, J.: Disruption of magnetospheric current sheet by quasi-electrostatic field in the substorm expansion  
 221 phase, *Annales Geophysicae*, 27, 1941-1950, 2009.

222 Liu, W. W., Liang, J., and Donovan, E. F.: Electrostatic field and ion temperature drop in thin current sheets: A theory,  
 223 *Journal of Geophysical Research: Space Physics*, 115, n/a-n/a, 2010.

224 Liu, W. W., Liang, J., and Donovan, E. F.: Interaction between kinetic ballooning perturbation and thin current sheet: Quasi-  
 225 electrostatic field, local onset, and global characteristics, *Geophysical Research Letters*, 35, 2008.

226 Lui, A. T. Y., Liou, K., Nosé M., Ohtani, S., Williams, D. J., Mukai, T., Tsuruda, K., and Kokubun, S.: Near-Earth  
 227 dipolarization: Evidence for a non-MHD process, *Geophysical Research Letters*, 26, 2905-2908, 1999.

228 Lui, A. T. Y., Lopez, R. E., Krimigis, S. M., McEntire, R. W., Zanetti, L. J., and Potemra, T. A.: A case study of magnetotail  
 229 current sheet disruption and diversion, *Geophysical Research Letters*, 15, 721-724, 1988.

230 [Lui, A. T. Y., A synthesis of magnetospheric substorm models, \*Journal of Geophysical Research\*, 96,1849, 1991.](#)

231 McFadden, J. P., Carlson, C. W., Larson, D., Ludlam, M., Abiad, R., Elliott, B., Turin, P., Marckwordt, M., and  
 232 Angelopoulos, V.: The THEMIS ESA Plasma Instrument and In-flight Calibration, *Space Science Reviews*, 141, 277-302,  
 233 2008.

234 Miyashita, Y., Machida, S., Mukai, T., Saito, Y., Tsuruda, K., Hayakawa, H., and Sutcliffe, P. R.: A statistical study of  
 235 variations in the near and middistant magnetotail associated with substorm onsets: GEOTAIL observations, *Journal of*  
 236 *Geophysical Research: Space Physics*, 105, 15913-15930, 2000.

237 Nagai, T.: Observed magnetic substorm signatures at synchronous altitude, *Journal of Geophysical Research*, 87, 4405, 1982.

238 Nakamura, R., Retino, A., Baumjohann, W., Volwerk, M., Erkaev, N., Klecker, B., Lucek, E. A., Dandouras, I., Andre, M.,  
 239 and Khotyaintsev, Y.: Evolution of dipolarization in the near-Earth current sheet induced by Earthward rapid flux transport,  
 240 *Annales Geophysicae*, 27, 1743-1754, 2009.

241 Nosé M., Keika, K., Kletzing, C. A., Spence, H. E., Smith, C. W., MacDowall, R. J., Reeves, G. D., Larsen, B. A., and  
 242 Mitchell, D. G.: Van Allen Probes observations of magnetic field dipolarization and its associated O<sup>+</sup> flux variations in the  
 243 inner magnetosphere at  $L < 6.6$ , *Journal of Geophysical Research-Space Physics*, 121, 7572-7589, 2016.

244 Nosé M., Takahashi, K., Keika, K., Kistler, L. M., Koga, K., Koshiishi, H., Matsumoto, H., Shoji, M., Miyashita, Y., and  
 245 Nomura, R.: Magnetic fluctuations embedded in dipolarization inside geosynchronous orbit and their associated selective  
 246 acceleration of O<sup>+</sup> ions, *Journal of Geophysical Research: Space Physics*, 119, 4639-4655, 2014.

247 Ohtani, S., Motoba, T., Gkioulidou, M., Takahashi, K., and Singer, H. J.: Spatial Development of the Dipolarization Region  
 248 in the Inner Magnetosphere, *Journal of Geophysical Research: Space Physics*, 123, 5452-5463, 2018.

249 Saito, M. H., Miyashita, Y., Fujimoto, M., Shinohara, I., Saito, Y., Liou, K., and Mukai, T.: Ballooning mode waves prior to  
 250 substorm-associated dipolarizations: Geotail observations, *Geophysical Research Letters*, 35, n/a-n/a, 2008.



251 Shiokawa, K., Baumjohann, W., Haerendel, G., Paschmann, G., Fennell, J. F., Friis-Christensen, E., Lühr, H., Reeves, G. D.,  
252 Russell, C. T., Sutcliffe, P. R., and Takahashi, K.: High-speed ion flow, substorm current wedge, and multiple Pi 2  
253 pulsations, *Journal of Geophysical Research: Space Physics*, 103, 4491-4507, 1998.  
254

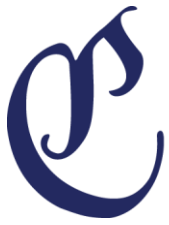

255

256 Figure 1 The solar wind, IMF  $\mathbf{B}_z$  conditions and geomagnetic indices between 01:00 UT and 23:00 UT on August 27, 2014. From top to  
257 bottom of (a ~ g) panels show the change of solar wind dynamic pressure (a),  $\mathbf{B}_{z,IMF}$  in GSM coordinate (b), the x component of the solar  
258 wind flow speed in GSM coordinate (c), electric field  $\mathbf{E}$  (d),  $AE/AU/AL$  index (e),  $SYM-H$  indices (f), and  $ASY-H$  index (g). From left to right,  
259 the vertical dotted lines in (a ~ g) panels marked the time 01:48 UT, 06:42 UT, 09:31 UT, 09:48 UT, 21:56 UT and 22:35 UT, respectively.

260

261 Figure 2 The orbits of TH-D and TH-E in the  $\mathbf{X} - \mathbf{Y}_{SM}$  plane and the  $\mathbf{X} - \mathbf{Z}_{SM}$  plane from 09:20 to 10:00 UT on 27 August 2014, which  
262 were in the nightside magnetosphere. The arrow shows the flying direction of the satellites. TH-D is red and TH-E is blue.

263

264 Figure 3 The electromagnetic field and plasma parameters detected by TH-D in the intervals from 09:25 UT to 09:55 UT on August 27,  
265 2014. The Solar Magnetic (SM) coordinated system is adopted. From top to bottom, panels showed that (a) the total magnetic field  $\mathbf{B}_t$   
266 (black) and the X component  $\mathbf{B}_x$  (red), (b) the Y component  $\mathbf{B}_y$  (green) and the Z component  $\mathbf{B}_z$  (blue), (c) the magnetic field elevation  
267 angle  $\theta$ ; (d) ion and electron density  $N_i, N_e$ ; (e) ion and electron temperature  $T_i, T_e$ ; (f) plasma beta  $\beta$ ; (g) the X component of ion  
268 parallel velocity and perpendicular velocity  $V_{parx}, V_{perpx}$ ; (h) the Y component of ion parallel velocity and perpendicular velocity  
269  $V_{pary}, V_{perpy}$ ; (i) the Z component of ion parallel velocity and perpendicular velocity  $V_{parz}, V_{perpz}$ ; (j) the electric field  $E_x$  (red),  $E_y$   
270 (black), and  $E_z$  (blue) by assuming  $\mathbf{E} \cdot \mathbf{B} = 0$ ; (k) the electric field  $E_{cx}$  (red),  $E_{cy}$  (black),  $E_{cz}$  (blue) calculated by  $\mathbf{E} = \mathbf{B} \times \mathbf{V}$ . The black  
271 vertical dashed lines marked the time 09:30:34 UT, 09:30:54 UT, 09:36:06 UT and 09:36:21 UT, respectively.

272

273 Figure 4 The electromagnetic field and plasma parameters detected by TH-E in the intervals from 09:25 UT to 09:55 UT on August 27,  
274 2014. The Figure format is the same as Figure 3. The black vertical dashed lines marked the time 09:35:36 UT and 09:36:18 UT.

275

276 Figure 5 The energy flux and pitch angle distribution of energetic electrons detected by SST/TH-D in 3 second time resolution. The red  
277 vertical lines marked the time 09:30:38 UT and 09:36:09 UT.

278

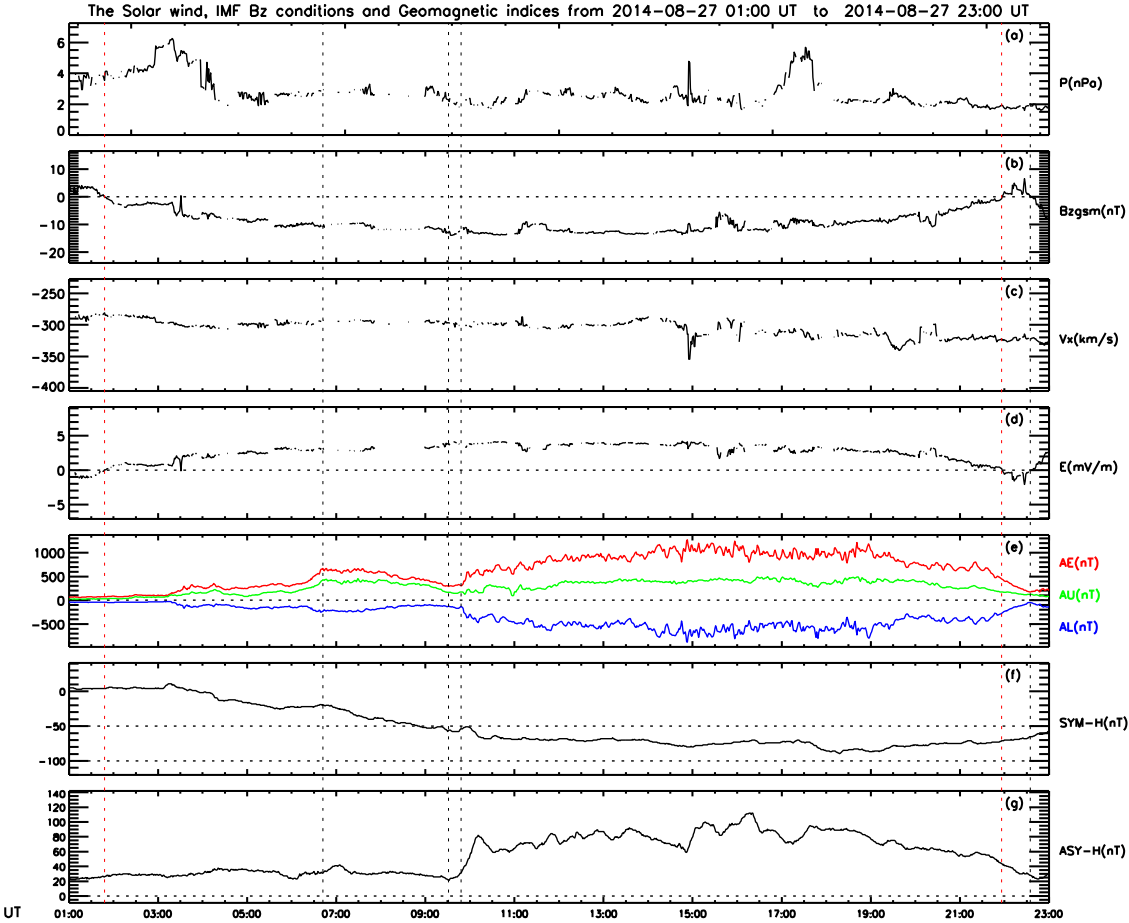

280

281 Figure 2

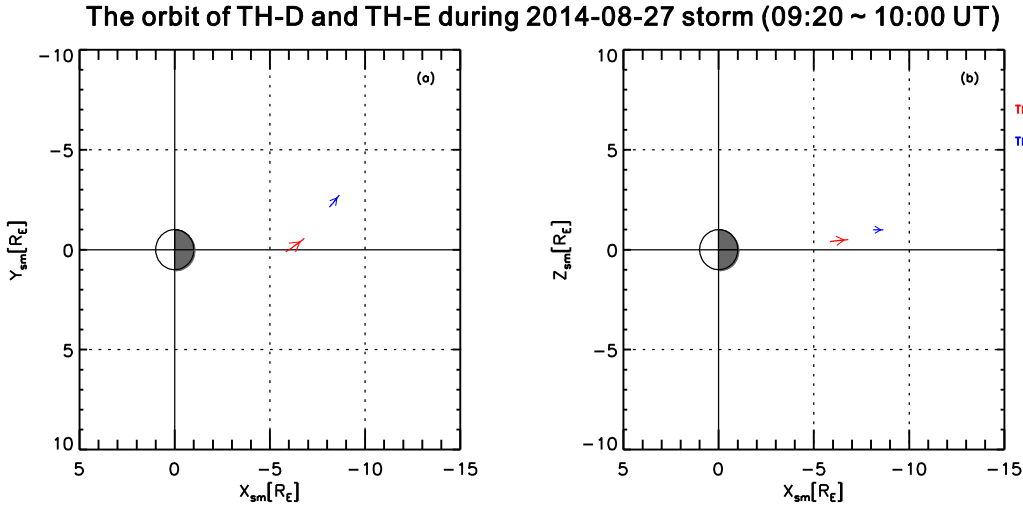

282

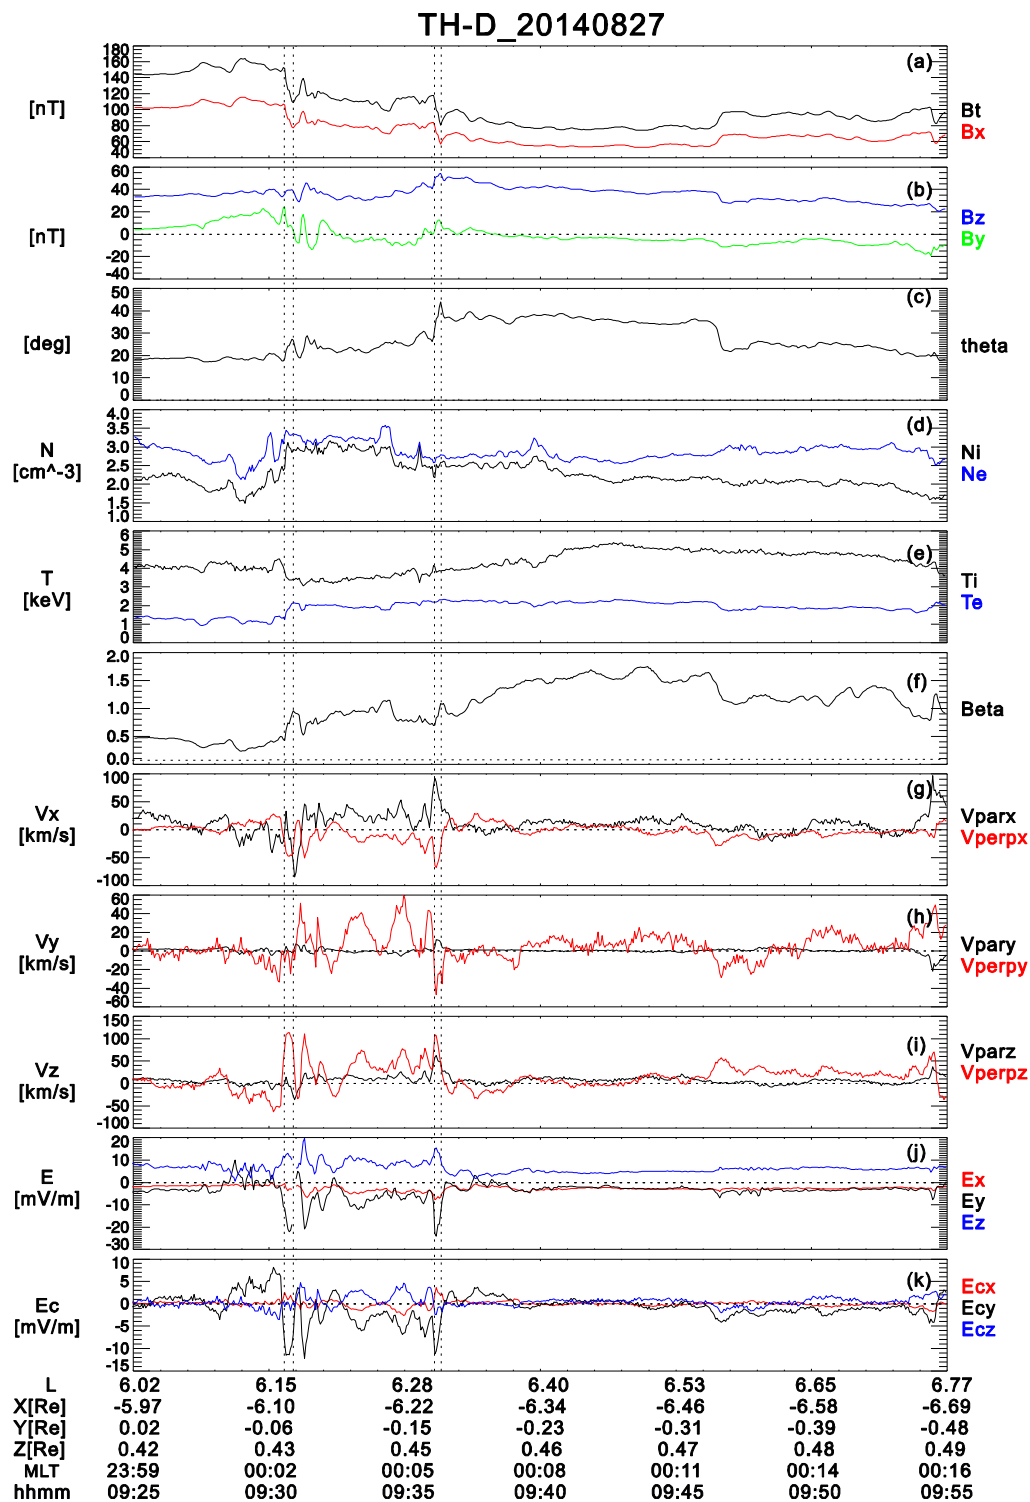

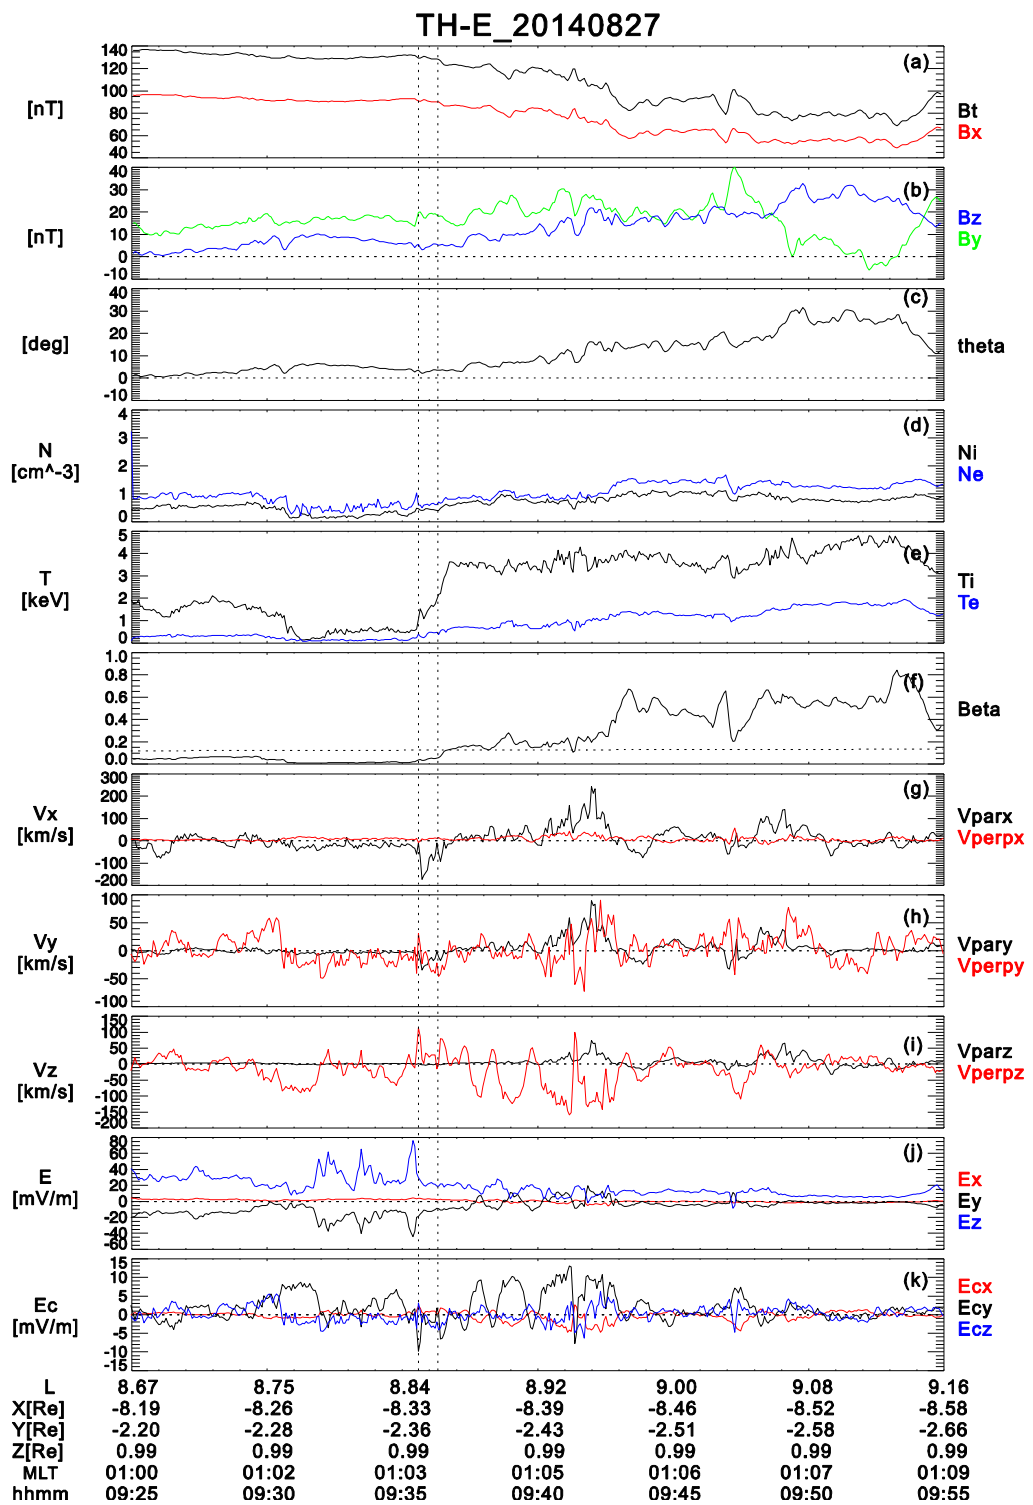

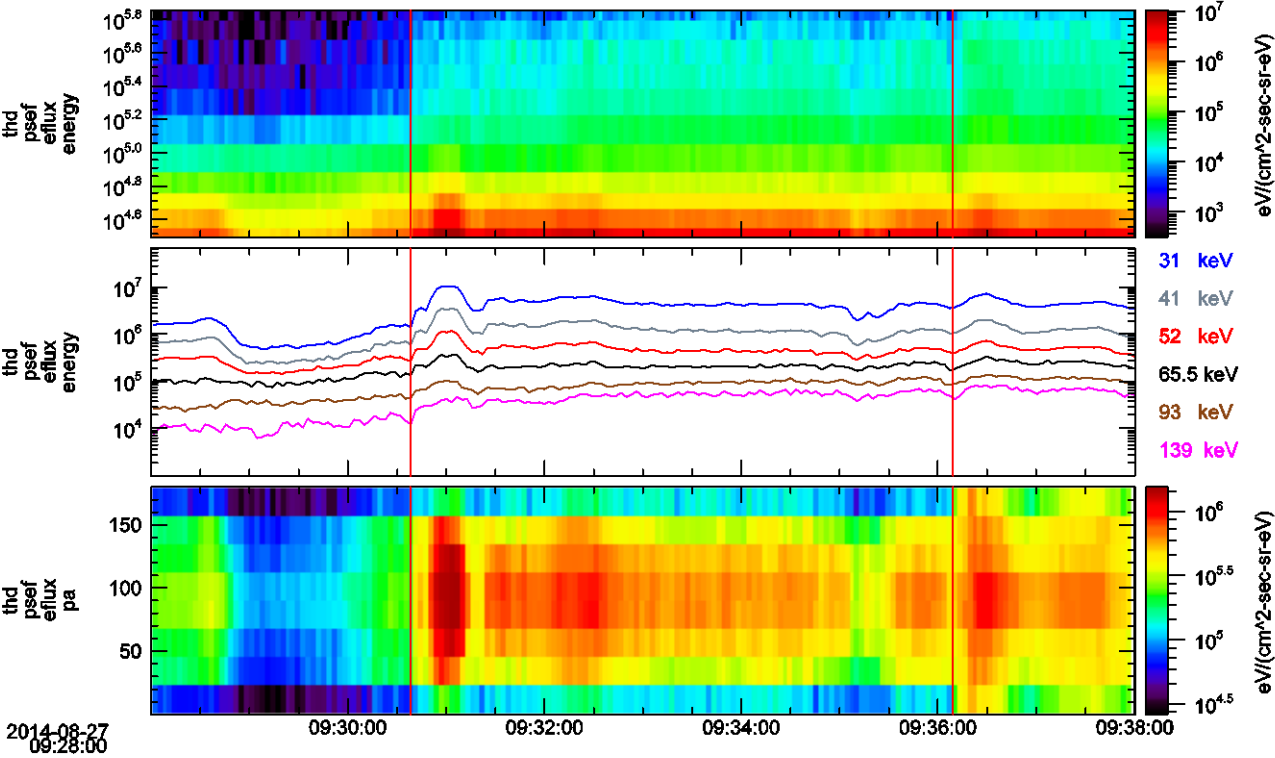

Supplement: Supplementary file [file angeo-2018-128-AC1-supplement.zip]
